# Supplementary material for: Clinical Cognitive Motor Dissociation: A Case Report Showing How Pitfalls Can Hinder Early Clinical Detection of Awareness
Source: MDPI journal article supplement (doi:10.3390/brainsci12020157), 2022-01-25
Supplement: s1 [file s1]

**Supplementary Table S1. Motor Behavior Tool revised (MBTr)**

| Item           | Notes/ins tructions                                               |                                                                                                                                                                                                                                                                  |
|----------------|-------------------------------------------------------------------|------------------------------------------------------------------------------------------------------------------------------------------------------------------------------------------------------------------------------------------------------------------|
| Positive signs |                                                                   |                                                                                                                                                                                                                                                                  |
| 1              | Spontaneous non-reflexive movements                               | Observation of the patient without any stimulation. At least one non-reflexive movement defined as non-stereotypical, non-contextualized and non-repetitive intentional motor pattern                                                                            |
| 2              | Response to command                                               | Any scorable response to verbal command                                                                                                                                                                                                                          |
| 3              | Visual fixation or visual pursuit                                 | Any clearly discernible visual fixation or visual pursuit in any direction                                                                                                                                                                                       |
| 4              | Responses in a motivational context                               | Any increase in frequency of non-reflexive motor responses in a salient context (e.g., mother tongue, patient's own name)                                                                                                                                        |
| 5              | Defensive non-reflexive response to a noxious stimulation—Nipple  | Twisting the patient's nipple while keeping the patient's healthier arm between the patient's body and the examiner's arm. Any attempt to push away the examiner's arm that is not a stereotypical posture involving extension and internal rotation of the arms |
| 6              | Defensive non-reflexive response to a noxious stimulation—Nailbed | Deep pressure to nail beds of four extremities. Any limb movement whose kinematics differs from a motor reflex response in terms of orientation planes and the type of elicited muscles is scored as defensive.                                                  |
| 7              | Response to a noxious stimulation—Grimace                         | Observation of at least one grimace during administration of noxious stimulation                                                                                                                                                                                 |
| Negative signs |                                                                   |                                                                                                                                                                                                                                                                  |
| 8              | Abnormal motor or neurovegetative responses to stimulation        | Observation of slow, stereotyped flexion or extension of the upper and/or lower extremities after noxious stimulation or neurovegetative responses (i.e., tachycardia, hypo/hyper-ventilation, hypertension, excessive sweating) to stimulation.                 |
| 9              | Signs of roving eyes or absence of oculoccephalic reflex          | Slowly roving eyes movements are typical of metabolic encephalopathy indicating diffuse cerebral dysfunction. Oculoccephalic responses imply intact brain-stem pathways                                                                                          |
